# Supplementary material for: The Malay Literacy of Suicide Scale: A Rasch Model Validation and Its Correlation with Mental Health Literacy among Malaysian Parents, Caregivers and Teachers
Source: MDPI journal article supplement (doi:10.3390/healthcare10071304), 2022-07-14
Supplement: s1 [file s1]

**Table S2.** Face validity of 27-item M-LOSS

| ITEM                                                                              | R1 | R2 | R3 | R4 | R5 | R6 | R7 | R8 | R9 | R10 | Raters in agreement | I-FVI    | UA   |
|-----------------------------------------------------------------------------------|----|----|----|----|----|----|----|----|----|-----|---------------------|----------|------|
| 1                                                                                 | 1  | 1  | 1  | 1  | 1  | 1  | 1  | 1  | 1  | 1   | 10                  | 1        | 1    |
| 2                                                                                 | 1  | 1  | 1  | 1  | 1  | 1  | 1  | 1  | 1  | 1   | 10                  | 1        | 1    |
| 3                                                                                 | 1  | 1  | 1  | 1  | 0  | 1  | 1  | 1  | 1  | 1   | 9                   | 0.9      | 0    |
| 4                                                                                 | 1  | 1  | 1  | 1  | 1  | 1  | 1  | 1  | 1  | 1   | 10                  | 1        | 1    |
| 5                                                                                 | 1  | 1  | 1  | 1  | 1  | 1  | 1  | 1  | 1  | 0   | 9                   | 0.9      | 0    |
| 6                                                                                 | 1  | 1  | 1  | 1  | 1  | 1  | 1  | 1  | 1  | 0   | 9                   | 0.9      | 0    |
| 7                                                                                 | 1  | 1  | 1  | 1  | 1  | 1  | 1  | 0  | 1  | 1   | 9                   | 0.9      | 0    |
| 8                                                                                 | 1  | 1  | 1  | 1  | 1  | 1  | 1  | 0  | 1  | 1   | 9                   | 0.9      | 0    |
| 9                                                                                 | 1  | 1  | 1  | 1  | 1  | 1  | 1  | 1  | 1  | 1   | 10                  | 1        | 1    |
| 10                                                                                | 1  | 1  | 1  | 1  | 1  | 1  | 1  | 1  | 1  | 1   | 10                  | 1        | 1    |
| 11                                                                                | 1  | 1  | 1  | 1  | 1  | 1  | 1  | 1  | 1  | 1   | 10                  | 1        | 1    |
| 12                                                                                | 1  | 1  | 1  | 1  | 1  | 1  | 1  | 1  | 1  | 1   | 10                  | 1        | 1    |
| 13                                                                                | 1  | 1  | 1  | 1  | 1  | 1  | 1  | 1  | 1  | 1   | 10                  | 1        | 1    |
| 14                                                                                | 1  | 1  | 1  | 1  | 1  | 1  | 1  | 0  | 1  | 1   | 9                   | 0.9      | 0    |
| 15                                                                                | 1  | 1  | 1  | 1  | 1  | 1  | 1  | 1  | 1  | 1   | 10                  | 1        | 1    |
| 16                                                                                | 1  | 1  | 1  | 1  | 1  | 1  | 1  | 1  | 1  | 1   | 10                  | 1        | 1    |
| 17                                                                                | 1  | 1  | 1  | 1  | 1  | 1  | 1  | 1  | 1  | 1   | 10                  | 1        | 1    |
| 18                                                                                | 1  | 1  | 1  | 1  | 1  | 1  | 1  | 1  | 1  | 1   | 10                  | 1        | 1    |
| 19                                                                                | 1  | 1  | 1  | 1  | 1  | 1  | 1  | 1  | 1  | 1   | 10                  | 1        | 1    |
| 20                                                                                | 1  | 1  | 1  | 1  | 1  | 1  | 1  | 1  | 1  | 1   | 10                  | 1        | 1    |
| 21                                                                                | 1  | 1  | 1  | 1  | 1  | 1  | 1  | 1  | 1  | 1   | 10                  | 1        | 1    |
| 22                                                                                | 1  | 1  | 1  | 1  | 1  | 1  | 1  | 1  | 1  | 1   | 10                  | 1        | 1    |
| 23                                                                                | 1  | 1  | 1  | 1  | 1  | 1  | 1  | 1  | 1  | 1   | 10                  | 1        | 1    |
| 24                                                                                | 1  | 1  | 1  | 1  | 1  | 1  | 1  | 0  | 1  | 1   | 9                   | 0.9      | 0    |
| 25                                                                                | 1  | 1  | 1  | 1  | 1  | 1  | 1  | 1  | 1  | 1   | 10                  | 1        | 1    |
| 26                                                                                | 1  | 1  | 1  | 1  | 1  | 1  | 1  | 1  | 1  | 1   | 10                  | 1        | 1    |
| 27                                                                                | 1  | 1  | 1  | 1  | 1  | 1  | 1  | 1  | 1  | 1   | 10                  | 1        | 1    |
|                                                                                   |    |    |    |    |    |    |    |    |    |     | S-FVI/Ave           | 0.97     |      |
| Proportion clarity & comprehension                                                |    |    |    |    |    |    |    |    |    |     |                     |          |      |
|                                                                                   |    |    |    |    |    |    |    |    |    |     |                     |          |      |
| Average proportion of items judged clarity and comprehension across the 10 raters |    |    |    |    |    |    |    |    |    |     | 0.97                | S-FVI/UA | 0.74 |
