# Supplementary material for: The Malay Literacy of Suicide Scale: A Rasch Model Validation and Its Correlation with Mental Health Literacy among Malaysian Parents, Caregivers and Teachers
Source: MDPI journal article supplement (doi:10.3390/healthcare10071304), 2022-07-14
Supplement: s1 [file s1]

**Table S6.** Separation and reliability indexes of the 26-item M-LOSS

| <b>Person Separation and Reliability Indexes</b> |       |       |         |       |       |      |        |      |
|--------------------------------------------------|-------|-------|---------|-------|-------|------|--------|------|
|                                                  | Score | Count | Measure | Error | Infit |      | Outfit |      |
|                                                  |       |       |         |       | IMSQ  | ZSTD | OMSQ   | ZSTS |
| Mean                                             | 16.0  | 26.0  | 0.76    | 0.51  | 1.00  | 0.0  | 0.99   | 0.0  |
| S.D.                                             | 3.9   | 0.0   | 0.94    | 0.09  | 0.22  | 1.0  | 0.48   | 0.9  |
| Real RMSE                                        | 0.52  |       |         |       |       |      |        |      |
| ADJ. SD                                          | 0.78  |       |         |       |       |      |        |      |
| Separation                                       | 1.52  |       |         |       |       |      |        |      |
| Person reliability                               | 0.70  |       |         |       |       |      |        |      |
| <b>Item Separation and Reliability Indexes</b>   |       |       |         |       |       |      |        |      |
|                                                  | Score | Count | Measure | Error | Infit |      | Outfit |      |
|                                                  |       |       |         |       | IMSQ  | ZSTD | OMSQ   | ZSTS |
| Mean                                             | 464.0 | 750.0 | 0.00    | 0.10  | 1.00  | 0.0  | 0.99   | 0.0  |
| S.D.                                             | 154.3 | 0.0   | 1.29    | 0.03  | 0.05  | 1.6  | 0.09   | 1.5  |
| Real RMSE                                        | 0.10  |       |         |       |       |      |        |      |
| ADJ. SD                                          | 1.29  |       |         |       |       |      |        |      |
| Separation                                       | 12.47 |       |         |       |       |      |        |      |
| Item reliability                                 | 0.99  |       |         |       |       |      |        |      |
