# Supplementary material for: The Malay Literacy of Suicide Scale: A Rasch Model Validation and Its Correlation with Mental Health Literacy among Malaysian Parents, Caregivers and Teachers
Source: MDPI journal article supplement (doi:10.3390/healthcare10071304), 2022-07-14
Supplement: s1 [file s1]

**Table S1.** Content validity of 27-item M-LOSS

| Item                                                            | Expert 1 | Expert 2 | Expert 3 | Expert 4 | Expert 5 | Expert 6 | Experts in Agreement | I-CVI    | UA   |
|-----------------------------------------------------------------|----------|----------|----------|----------|----------|----------|----------------------|----------|------|
| 1                                                               | 1        | 1        | 1        | 1        | 1        | 1        | 6                    | 1        | 1    |
| 2                                                               | 1        | 1        | 1        | 1        | 1        | 1        | 6                    | 1        | 1    |
| 3                                                               | 1        | 1        | 1        | 1        | 1        | 1        | 6                    | 1        | 1    |
| 4                                                               | 1        | 1        | 1        | 1        | 1        | 1        | 6                    | 1        | 1    |
| 5                                                               | 1        | 1        | 1        | 1        | 1        | 1        | 6                    | 1        | 1    |
| 6                                                               | 1        | 1        | 0        | 1        | 1        | 1        | 5                    | 0.83     | 0    |
| 7                                                               | 1        | 1        | 0        | 1        | 1        | 1        | 5                    | 0.83     | 0    |
| 8                                                               | 1        | 1        | 1        | 1        | 1        | 1        | 6                    | 1        | 1    |
| 9                                                               | 1        | 0        | 1        | 1        | 1        | 1        | 5                    | 0.83     | 0    |
| 10                                                              | 1        | 1        | 1        | 1        | 1        | 1        | 6                    | 1        | 1    |
| 11                                                              | 1        | 1        | 1        | 1        | 1        | 1        | 6                    | 1        | 1    |
| 12                                                              | 1        | 1        | 1        | 1        | 1        | 1        | 6                    | 1        | 1    |
| 13                                                              | 1        | 1        | 1        | 1        | 1        | 1        | 6                    | 1        | 1    |
| 14                                                              | 1        | 1        | 0        | 1        | 1        | 1        | 5                    | 0.83     | 0    |
| 15                                                              | 1        | 1        | 1        | 1        | 1        | 1        | 6                    | 1        | 1    |
| 16                                                              | 1        | 1        | 1        | 1        | 1        | 1        | 6                    | 1        | 1    |
| 17                                                              | 1        | 1        | 1        | 1        | 1        | 1        | 6                    | 1        | 1    |
| 18                                                              | 1        | 1        | 1        | 0        | 1        | 1        | 5                    | 0.83     | 0    |
| 19                                                              | 1        | 1        | 1        | 0        | 1        | 1        | 5                    | 0.83     | 0    |
| 20                                                              | 1        | 1        | 1        | 0        | 1        | 1        | 5                    | 0.83     | 0    |
| 21                                                              | 1        | 1        | 1        | 0        | 1        | 1        | 5                    | 0.83     | 0    |
| 22                                                              | 1        | 1        | 1        | 0        | 1        | 1        | 5                    | 0.83     | 0    |
| 23                                                              | 1        | 1        | 1        | 0        | 1        | 1        | 5                    | 0.83     | 0    |
| 24                                                              | 1        | 1        | 1        | 1        | 1        | 1        | 6                    | 1        | 1    |
| 25                                                              | 1        | 1        | 1        | 1        | 1        | 1        | 6                    | 1        | 1    |
| 26                                                              | 1        | 1        | 1        | 1        | 1        | 1        | 6                    | 1        | 1    |
| 27                                                              | 1        | 1        | 1        | 1        | 1        | 1        |                      |          |      |
|                                                                 |          |          |          |          |          |          | S-CVI/Ave            | 0.94     |      |
| Proportion relevance                                            | 1        | 0.96     | 0.89     | 0.78     | 1        | 1        |                      |          |      |
| Average proportion of item judged as relevance across 6 experts |          |          |          |          |          |          | 0.94                 | S-CVI/UA | 0.63 |
