# Supplementary material for: The Malay Literacy of Suicide Scale: A Rasch Model Validation and Its Correlation with Mental Health Literacy among Malaysian Parents, Caregivers and Teachers
Source: MDPI journal article supplement (doi:10.3390/healthcare10071304), 2022-07-14
Supplement: s1 [file s1]

**Table S5.** Principal component analysis of residual (PCAR) of the 26-item M-LOSS

|                                                  |      | <b>Empirical</b> |        | <b>Modeled</b> |
|--------------------------------------------------|------|------------------|--------|----------------|
| Total raw variance in observation                | 36.6 | 100.0%           |        | 100.0%         |
| Raw variance explained by measures               | 10.6 | 29.0%            |        | 25.9%          |
| Raw variance explained by persons                | 3.9  | 10.7%            |        | 9.5%           |
| Raw variance explained by items                  | 6.7  | 18.4%            |        | 16.4%          |
| Raw unexplained variance (total)                 | 26.0 | 71.0%            | 100.0% | 74.1%          |
| Unexplained variance in 1 <sup>st</sup> contrast | 2.0  | 5.3%             | 7.5%   |                |
| Unexplained variance in 2 <sup>nd</sup> contrast | 1.7  | 4.7%             | 6.6%   |                |
| Unexplained variance in 3 <sup>rd</sup> contrast | 1.5  | 4.2%             | 5.9%   |                |
| Unexplained variance in 4 <sup>th</sup> contrast | 1.3  | 4.0%             | 5.6%   |                |
| Unexplained variance in 5 <sup>th</sup> contrast | 1.3  | 3.5%             | 5.0%   |                |
