# Supplementary material for: The Malay Literacy of Suicide Scale: A Rasch Model Validation and Its Correlation with Mental Health Literacy among Malaysian Parents, Caregivers and Teachers
Source: MDPI journal article supplement (doi:10.3390/healthcare10071304), 2022-07-14
Supplement: s1 [file s1]

**Table S7.** Respondents' sociodemographic (n = 867)

| Variable                                      | Mean (SD)    |
|-----------------------------------------------|--------------|
| Age (year)                                    | 43.81 (8.34) |
| Variable                                      | n (%)        |
| Role                                          |              |
| Parents/caretakers                            | 560 (64.6)   |
| Teacher                                       | 307 (35.4)   |
| Sex                                           |              |
| Male                                          | 247 (28.5)   |
| Female                                        | 620 (71.5)   |
| Ethnicity                                     |              |
| Malay                                         | 755 (87.1)   |
| Chinese                                       | 49 (5.7)     |
| Indian                                        | 4 (0.5)      |
| Other Bumiputera                              | 48 (5.5)     |
| Others                                        | 11 (1.3)     |
| Religion                                      |              |
| Islam                                         | 779 (89.9)   |
| Christian                                     | 49 (5.7)     |
| Hindu                                         | 3 (0.3)      |
| Buddhist                                      | 34 (3.9)     |
| Others                                        | 2 (0.2)      |
| Education level                               |              |
| No formal education                           | 2 (0.2)      |
| Primary education                             | 11 (1.3)     |
| Secondary education                           | 202 (23.3)   |
| Tertiary education                            | 652 (75.2)   |
| Occupation sector                             |              |
| Unemployed/homemaker                          | 102 (11.8)   |
| Government                                    | 578 (66.7)   |
| Private                                       | 106 (12.2)   |
| Self-employed                                 | 63 (7.3)     |
| Pensioner                                     | 18 (2.1)     |
| Monthly household income bracket <sup>a</sup> |              |
| B40                                           | 346 (39.9)   |
| M40                                           | 394 (45.4)   |
| T20                                           | 127 (14.6)   |
| School locality                               |              |
| Urban                                         | 502 (58.1)   |
| Rural                                         | 363 (41.9)   |
| School type                                   |              |
| National secondary schools (SMK)              | 341 (39.3)   |

|                                                  |            |
|--------------------------------------------------|------------|
| Full boarding schools (SBP)                      | 321 (37.0) |
| Religious secondary schools (SMA)                | 205 (23.6) |
| Personal history of mental health                |            |
| Yes                                              | 21 (2.4)   |
| No                                               | 846 (97.6) |
| Known contact with mental health issues          |            |
| Yes                                              | 160 (18.5) |
| No                                               | 707 (81.5) |
| Assisted those with mental health issues         |            |
| Yes                                              | 217 (25.0) |
| No                                               | 650 (75.0) |
| Attended formal mental health first aid training |            |
| Yes                                              |            |
| No                                               | 88 (10.1)  |
|                                                  | 779 (89.9) |
