# Supplementary material for: The Malay Literacy of Suicide Scale: A Rasch Model Validation and Its Correlation with Mental Health Literacy among Malaysian Parents, Caregivers and Teachers
Source: MDPI journal article supplement (doi:10.3390/healthcare10071304), 2022-07-14
Supplement: s1 [file s1]

**Table S3.** Item fit analysis for 27-item M-LOSS

| Entry<br>no. | Total<br>score | Count | Measure | Model<br>S.E. | Infit |      | Outfit |      | Pt-Measure |      | Exact<br>OBS% | Match<br>EXP% | Items  |
|--------------|----------------|-------|---------|---------------|-------|------|--------|------|------------|------|---------------|---------------|--------|
|              |                |       |         |               | MNSQ  | ZSTD | MNSQ   | ZSTD | CORR.      | EXP. |               |               |        |
| 18           | 627            | 750   | -1.07   | 0.10          | 1.12  | 1.8  | 1.25   | 2.2  | 0.16       | 0.28 | 82.6          | 84.0          | LOSS18 |
| 27           | 726            | 750   | -3.02   | 0.22          | 0.99  | 0.0  | 0.84   | -0.5 | 0.20       | 0.19 | 97.0          | 97.0          | LOSS27 |
| 3            | 687            | 750   | -1.90   | 0.14          | 1.02  | 0.3  | 0.90   | -0.5 | 0.23       | 0.23 | 91.4          | 91.8          | LOSS3  |
| 20           | 591            | 750   | -0.72   | 0.09          | 1.05  | 1.1  | 1.11   | 1.3  | 0.24       | 0.30 | 79.1          | 79.4          | LOSS20 |
| 12           | 675            | 750   | -1.70   | 0.13          | 0.99  | -0.1 | 0.97   | -0.1 | 0.25       | 0.25 | 90.6          | 90.2          | LOSS12 |
| 5            | 710            | 750   | -2.43   | 0.17          | 0.97  | -0.2 | 0.81   | -0.9 | 0.26       | 0.21 | 94.9          | 94.8          | LOSS5  |
| 19           | 450            | 750   | 0.32    | 0.08          | 1.10  | 3.4  | 1.13   | 2.8  | 0.26       | 0.36 | 62.9          | 66.5          | LOSS19 |
| 1            | 296            | 750   | 1.30    | 0.08          | 1.11  | 3.5  | 1.17   | 3.4  | 0.27       | 0.38 | 64.5          | 68.4          | LOSS1  |
| 13           | 609            | 750   | -0.89   | 0.10          | 1.01  | 0.2  | 0.98   | -0.1 | 0.28       | 0.29 | 81.6          | 81.7          | LOSS13 |
| 9            | 490            | 750   | 0.05    | 0.08          | 1.02  | 0.8  | 1.04   | 0.7  | 0.32       | 0.34 | 69.9          | 69.1          | LOSS9  |
| 11           | 634            | 750   | -1.15   | 0.11          | 0.96  | -0.6 | 0.94   | -0.5 | 0.32       | 0.28 | 85.3          | 84.9          | LOSS11 |
| 22           | 531            | 750   | -0.23   | 0.09          | 1.01  | 0.3  | 1.00   | 0.1  | 0.32       | 0.33 | 72.5          | 72.7          | LOSS22 |
| 14           | 374            | 750   | 0.80    | 0.08          | 1.04  | 1.5  | 1.09   | 2.1  | 0.33       | 0.37 | 62.0          | 65.1          | LOSS14 |
| 4            | 614            | 750   | -0.93   | 0.10          | 0.95  | -0.8 | 0.92   | -0.8 | 0.34       | 0.29 | 82.8          | 82.3          | LOSS4  |
| 26           | 238            | 750   | 1.70    | 0.09          | 1.02  | 0.6  | 1.10   | 1.6  | 0.35       | 0.38 | 72.7          | 73.0          | LOSS26 |
| 10           | 503            | 750   | -0.03   | 0.08          | 0.98  | -0.5 | 0.97   | -0.4 | 0.35       | 0.34 | 71.9          | 70.0          | LOSS10 |
| 17           | 312            | 750   | 1.19    | 0.08          | 1.03  | 1.0  | 1.03   | 0.7  | 0.35       | 0.38 | 65.3          | 67.3          | LOSS17 |
| 8            | 311            | 750   | 1.20    | 0.08          | 1.03  | 0.9  | 1.02   | 0.5  | 0.36       | 0.38 | 66.5          | 67.3          | LOSS8  |
| 2            | 292            | 750   | 1.32    | 0.08          | 1.02  | 0.7  | 1.01   | 0.1  | 0.36       | 0.38 | 66.9          | 68.7          | LOSS2  |
| 23           | 346            | 750   | 0.97    | 0.08          | 1.00  | -0.1 | 0.98   | -0.4 | 0.38       | 0.38 | 65.9          | 65.6          | LOSS23 |
| 16           | 462            | 750   | 0.24    | 0.08          | 0.96  | -1.4 | 0.91   | -1.8 | 0.40       | 0.35 | 66.9          | 67.2          | LOSS16 |
| 6            | 336            | 750   | 1.04    | 0.08          | 0.96  | -1.3 | 0.94   | -1.4 | 0.41       | 0.38 | 67.6          | 66.1          | LOSS6  |
| 7            | 313            | 750   | 1.18    | 0.08          | 0.97  | -1.2 | 0.94   | -1.2 | 0.41       | 0.38 | 67.2          | 67.2          | LOSS7  |
| 15           | 521            | 750   | -0.16   | 0.08          | 0.92  | -2.3 | 0.85   | -2.5 | 0.42       | 0.33 | 72.9          | 71.7          | LOSS15 |
| 25           | 299            | 750   | 1.28    | 0.08          | 0.95  | -1.8 | 0.92   | -1.7 | 0.43       | 0.38 | 71.1          | 68.2          | LOSS25 |
| 21           | 505            | 750   | -0.05   | 0.08          | 0.90  | -3.0 | 0.83   | -3.0 | 0.44       | 0.34 | 73.2          | 70.2          | LOSS21 |
| 24           | 238            | 750   | 1.70    | 0.09          | 0.91  | -2.4 | 0.93   | -1.1 | 0.46       | 0.38 | 76.4          | 73.0          | LOSS24 |
