# Supplementary material for: The Malay Literacy of Suicide Scale: A Rasch Model Validation and Its Correlation with Mental Health Literacy among Malaysian Parents, Caregivers and Teachers
Source: MDPI journal article supplement (doi:10.3390/healthcare10071304), 2022-07-14
Supplement: s1 [file s1]

**Table S4.** Item fit analysis for 26-item M-LOSS

| Entry<br>no. | Total<br>score | Count | Measure | Model<br>S.E. | Infit |      | Outfit |      | Pt-Measure |      | Exact<br>OBS% | Match<br>EXP% | Items  |
|--------------|----------------|-------|---------|---------------|-------|------|--------|------|------------|------|---------------|---------------|--------|
|              |                |       |         |               | MNSQ  | ZSTD | MNSQ   | ZSTD | CORR.      | EXP. |               |               |        |
| 26           | 726            | 750   | -3.07   | 0.22          | 1.00  | 0.1  | 0.89   | -0.3 | 0.20       | 0.19 | 97.0          | 97.0          | LOSS27 |
| 3            | 687            | 750   | -1.96   | 0.14          | 1.04  | 0.4  | 0.93   | -0.3 | 0.22       | 0.24 | 91.4          | 91.8          | LOSS3  |
| 19           | 591            | 750   | -0.76   | 0.09          | 1.07  | 1.3  | 1.14   | 1.5  | 0.24       | 0.31 | 78.2          | 79.5          | LOSS20 |
| 18           | 450            | 750   | 0.28    | 0.08          | 1.11  | 3.8  | 1.16   | 3.2  | 0.26       | 0.36 | 62.2          | 66.8          | LOSS19 |
| 12           | 675            | 750   | -1.75   | 0.13          | 0.99  | -0.1 | 0.98   | -0.1 | 0.26       | 0.25 | 90.6          | 90.2          | LOSS12 |
| 5            | 710            | 750   | -2.49   | 0.17          | 0.97  | -0.2 | 0.82   | -0.8 | 0.26       | 0.22 | 94.9          | 94.8          | LOSS5  |
| 1            | 296            | 750   | 1.26    | 0.08          | 1.11  | 3.6  | 1.17   | 3.3  | 0.28       | 0.39 | 63.9          | 68.5          | LOSS1  |
| 13           | 609            | 750   | -0.93   | 0.10          | 1.02  | 0.4  | 0.99   | -0.1 | 0.29       | 0.30 | 81.7          | 81.8          | LOSS13 |
| 9            | 490            | 750   | 0.01    | 0.08          | 1.04  | 1.1  | 1.06   | 1.0  | 0.32       | 0.35 | 69.9          | 69.4          | LOSS9  |
| 11           | 634            | 750   | -1.20   | 0.11          | 0.96  | -0.5 | 0.95   | -0.4 | 0.32       | 0.29 | 85.5          | 85.0          | LOSS1  |
| 21           | 531            | 750   | -0.28   | 0.09          | 1.02  | 0.5  | 1.01   | 0.2  | 0.32       | 0.34 | 72.3          | 73.0          | LOSS22 |
| 14           | 374            | 750   | 0.76    | 0.08          | 1.04  | 1.7  | 1.09   | 2.2  | 0.33       | 0.38 | 62.4          | 65.4          | LOSS14 |
| 4            | 614            | 750   | -0.98   | 0.10          | 0.96  | -0.7 | 0.94   | -0.5 | 0.34       | 0.30 | 82.6          | 82.4          | LOSS4  |
| 25           | 238            | 750   | 1.67    | 0.09          | 1.03  | 0.7  | 1.11   | 1.8  | 0.35       | 0.39 | 72.8          | 73.1          | LOSS26 |
| 17           | 312            | 750   | 1.16    | 0.08          | 1.03  | 1.2  | 1.04   | 0.9  | 0.36       | 0.39 | 64.7          | 67.4          | LOSS17 |
| 10           | 503            | 750   | -0.08   | 0.08          | 0.98  | -0.5 | 0.97   | -0.5 | 0.36       | 0.35 | 72.1          | 70.4          | LOSS10 |
| 8            | 311            | 750   | 1.16    | 0.08          | 1.02  | 0.7  | 1.01   | 0.3  | 0.37       | 0.39 | 66.8          | 67.5          | LOSS8  |
| 2            | 292            | 750   | 1.29    | 0.08          | 1.02  | 0.7  | 1.00   | 0.1  | 0.37       | 0.39 | 67.2          | 68.8          | LOSS2  |
| 22           | 346            | 750   | 0.94    | 0.08          | 1.00  | -0.1 | 0.98   | -0.3 | 0.39       | 0.38 | 65.8          | 65.9          | LOSS23 |
| 16           | 462            | 750   | 0.20    | 0.08          | 0.96  | -1.4 | 0.91   | -1.8 | 0.40       | 0.36 | 67.0          | 67.5          | LOSS16 |
| 15           | 521            | 750   | -0.20   | 0.09          | 0.93  | -2.1 | 0.86   | -2.3 | 0.42       | 0.34 | 72.8          | 72.0          | LOSS15 |
| 7            | 313            | 750   | 1.15    | 0.08          | 0.97  | -1.1 | 0.94   | -1.3 | 0.42       | 0.38 | 68.6          | 67.4          | LOSS7  |
| 6            | 336            | 750   | 1.00    | 0.08          | 0.96  | -1.4 | 0.94   | -1.5 | 0.42       | 0.38 | 67.2          | 66.3          | LOSS6  |
| 24           | 299            | 750   | 1.24    | 0.08          | 0.95  | -1.6 | 0.93   | -1.5 | 0.43       | 0.39 | 70.8          | 68.3          | LOSS25 |
| 20           | 505            | 750   | -0.09   | 0.08          | 0.90  | -3.0 | 0.83   | -3.0 | 0.44       | 0.35 | 74.8          | 70.5          | LOSS21 |
| 23           | 238            | 750   | 1.67    | 0.09          | 0.91  | -2.4 | 0.95   | -0.8 | 0.46       | 0.39 | 76.6          | 73.1          | LOSS24 |
