# Supplementary material for: The Malay Literacy of Suicide Scale: A Rasch Model Validation and Its Correlation with Mental Health Literacy among Malaysian Parents, Caregivers and Teachers
Source: Healthcare (Basel). 2022 Jul 14;10(7):1304. doi: 10.3390/healthcare10071304 (PMC9317984; doi:10.3390/healthcare10071304)
Supplement: Supplementary file 1 [file healthcare-10-01304-s001.zip]

Archive with 7 entries (7 files):
- S1 Table.pdf
- S2 Table.pdf
- S3 Table.pdf
- S4 Table.pdf
- S5 Table.pdf
- S6 Table.pdf
- S7 Table.pdf
